# Supplementary material for: Improved light-harvesting and suppressed charge recombination by introduction of a nanograss-like SnO2 interlayer for efficient CdS quantum dot sensitized solar cells
Source: Royal Society of Chemistry journal article supplement (doi:10.1039/c9ra08234d), 2019-01-01
Supplement: c9ra08234d1.pdf [file c9ra08234d1.pdf]

## **Supporting Information**

### **Improved light-harvesting and suppressed charge recombination by introduction of nanograss-like SnO<sub>2</sub> interlayer for efficient CdS quantum dot sensitized solar cells**

Sangaraju Sambasivam<sup>a</sup>, Chandu V. V. Muralee Gopi<sup>\*b</sup>, Hee-Je Kim<sup>\*b</sup>,  
and Ihab M. Obaidat<sup>\*a</sup>

<sup>a</sup> Department of Physics, United Arab Emirates University, Al-Ain 15551, UAE

<sup>b</sup> Department of Electrical Engineering, Pusan National University, Geumjeong-gu, Busan,  
South Korea-46241.

#### **Corresponding Author\***

E-mail: [iobaidat@uaeu.ac.ae](mailto:iobaidat@uaeu.ac.ae) (I.M. Obaidat); [naga5673@gmail.com](mailto:naga5673@gmail.com) (C.V.V.M. Gopi);  
[heeje@pusan.ac.kr](mailto:heeje@pusan.ac.kr) (H.J. Kim).

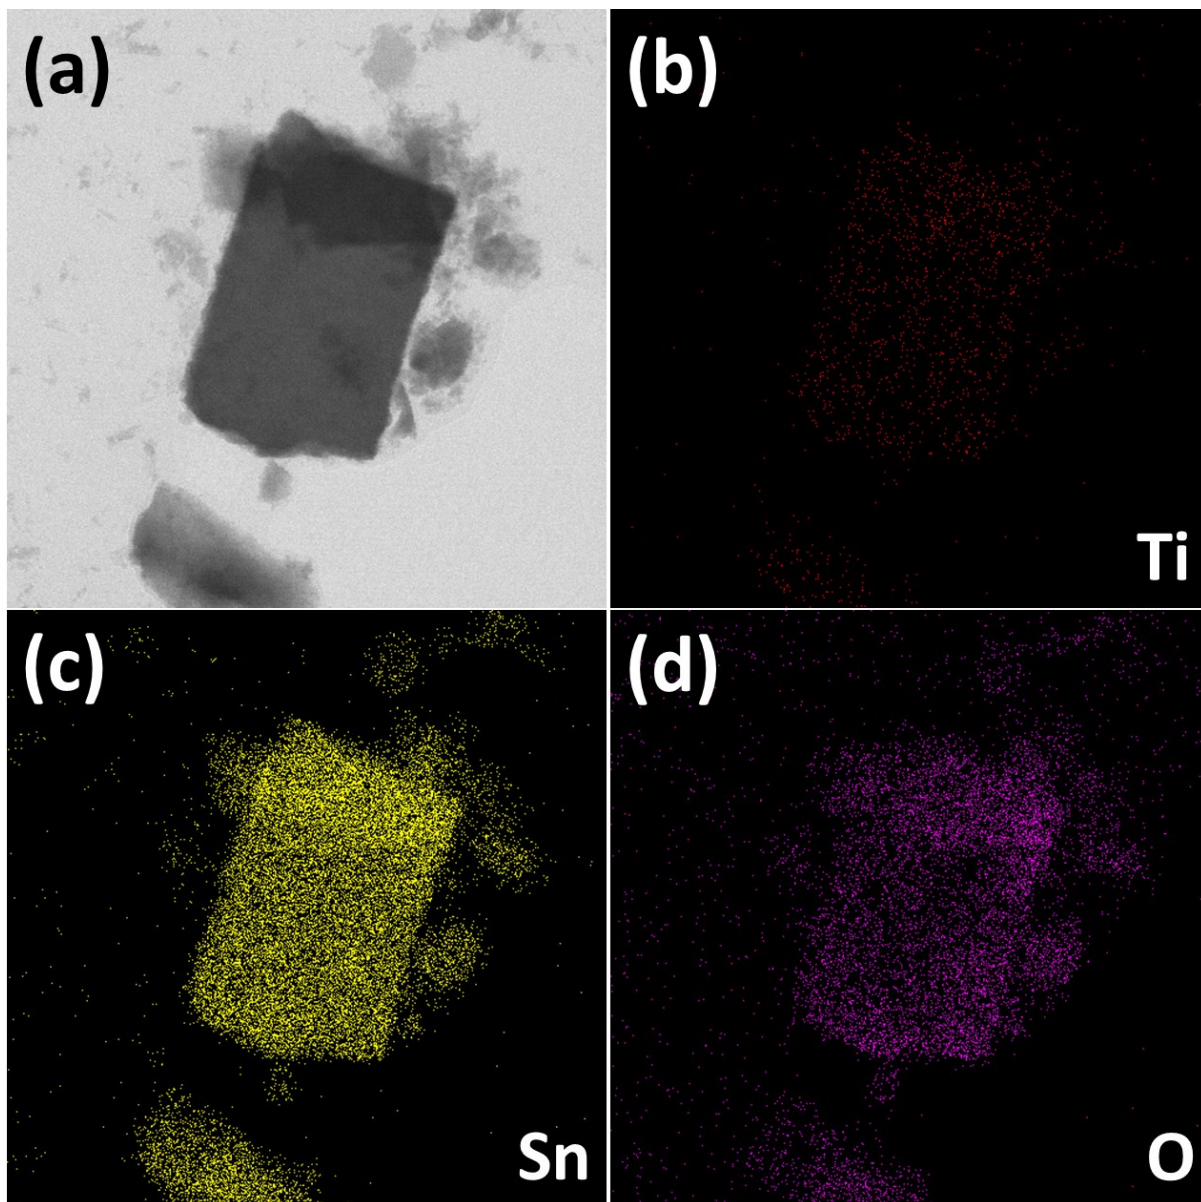

**Fig. S1.** SEM-EDX mapping results of  $\text{TiO}_2/\text{SnO}_2$  NGs electrode.
